# Supplementary material
Source: PubMed Central journal article supplement (PMC5250706)
Supplement: ajtr0009-0090-f7.pdf [file ajtr0009-0090-f7.pdf]

## MHENCRC acts as an oncogene in melanoma

**Supplementary Table 1.** Clinicopathologic characteristics of melanoma patients

| Patients ID | Age | Sex | Stage | Survival | Follow-up time (months) |
|-------------|-----|-----|-------|----------|-------------------------|
| 1           | 40  | F   | I     | Yes      | 58                      |
| 2           | 39  | F   | I     | No       | 46                      |
| 3           | 42  | F   | I     | Yes      | 55                      |
| 4           | 67  | M   | II    | Yes      | 57                      |
| 5           | 62  | F   | III   | Yes      | 58                      |
| 6           | 68  | F   | II    | No       | 21                      |
| 7           | 71  | M   | III   | Yes      | 59                      |
| 8           | 61  | M   | III   | No       | 16                      |
| 9           | 65  | F   | II    | Yes      | 59                      |
| 10          | 35  | F   | II    | Yes      | 59                      |
| 11          | 74  | F   | III   | No       | 28                      |
| 12          | 53  | F   | III   | No       | 5                       |
| 13          | 43  | M   | I     | Yes      | 59                      |
| 14          | 78  | M   | II    | Yes      | 58                      |
| 15          | 65  | F   | II    | Yes      | 57                      |
| 16          | 59  | F   | III   | Yes      | 57                      |
| 17          | 54  | M   | II    | No       | 18                      |
| 18          | 65  | M   | II    | Yes      | 56                      |
| 19          | 56  | M   | I     | Yes      | 58                      |
| 20          | 59  | M   | II    | No       | 18                      |
| 21          | 73  | M   | I     | Yes      | 57                      |
| 22          | 57  | F   | II    | Yes      | 56                      |
| 23          | 59  | F   | I     | Yes      | 57                      |
| 24          | 72  | F   | II    | No       | 32                      |
| 25          | 47  | M   | I     | Yes      | 59                      |
| 26          | 63  | M   | III   | No       | 20                      |
| 27          | 63  | M   | II    | No       | 32                      |
| 28          | 33  | M   | III   | No       | 41                      |
| 29          | 44  | F   | III   | No       | 12                      |
| 30          | 48  | M   | II    | Yes      | 55                      |

## MHENCN acts as an oncogene in melanoma

**Supplementary Table 2.** Clinicopathologic characteristics of melanocytic nevus controls

| Patients ID | Age | Sex |
|-------------|-----|-----|
| 1           | 63  | F   |
| 2           | 57  | F   |
| 3           | 49  | F   |
| 4           | 69  | F   |
| 5           | 67  | M   |
| 6           | 62  | F   |
| 7           | 54  | M   |
| 8           | 38  | F   |
| 9           | 35  | F   |
| 10          | 76  | F   |
| 11          | 49  | F   |
| 12          | 42  | M   |
| 13          | 46  | M   |
| 14          | 55  | F   |
| 15          | 64  | M   |
| 16          | 68  | F   |
| 17          | 76  | M   |
| 18          | 71  | M   |
| 19          | 56  | M   |
| 20          | 63  | M   |

**Supplementary Table 3.** The comparisons of clinical characteristics between melanoma patients and controls

| Characteristics | Melanoma | Control | $\chi^2$ | <i>p</i> value* |
|-----------------|----------|---------|----------|-----------------|
| Age             |          |         | 0.053    | 0.817           |
| < 60 y          | 16       | 10      |          |                 |
| > 60 y          | 14       | 10      |          |                 |
| Gender          |          |         | 0.120    | 0.729           |
| Male            | 15       | 9       |          |                 |
| Female          | 15       | 11      |          |                 |

\**p* value was acquired by Pearson chi-square test.

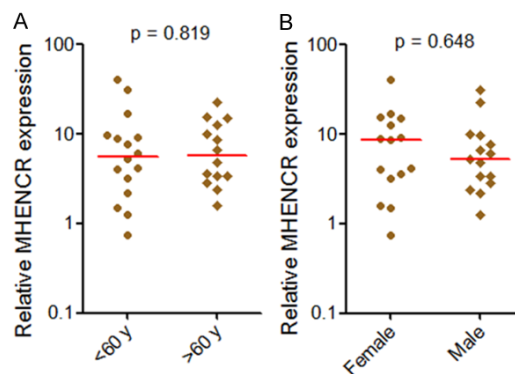

**Supplementary Figure 1.** MHENCN expression in melanoma with different clinical characteristics. A: MHENCN expression levels in 30 malignant melanoma tissues with different age were measured by qPCR. *P* = 0.819 by Mann-Whitney U test. B: MHENCN expression levels in 30 melanoma tissues with different sex were measured by qPCR. *P* = 0.648 by Mann-Whitney U test.

## MHENCN acts as an oncogene in melanoma

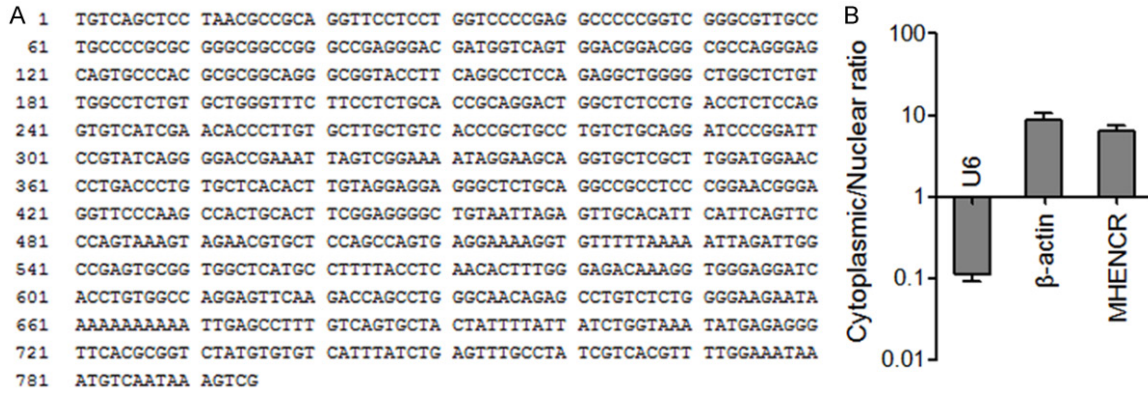

**Supplementary Figure 2.** The full-length sequences and subcellular localization of MHENCN in melanoma cells. A: The full-length sequences of MHENCN. B: MHENCN subcellular location in A375 cells was determined by cytoplasmic and nuclear RNA purification, followed by qPCR detection. U6 and  $\beta$ -actin were used as nuclear and cytoplasmic controls, respectively. n = 3.
